# Supplementary material for: Green Extraction of Hodgsonia heteroclita Oilseed Cake Powder to Obtain Optimal Antioxidants and Health Benefits
Source: MDPI journal article supplement (doi:10.3390/foods12234281), 2023-11-27

---

## Supplementary materials

# Green Extraction of *Hodgsonia heteroclita* Oilseed Cake Powder to Obtain Optimal Antioxidants and Health Benefits

Woorawee Inthachai, Sirinapa Thangsiri, Chanakan Khemthong, Nattira On-Nom, Chaowanee Chupeerach, Yuraporn Sahasakul, Piya Temviriyakul <sup>†</sup> and Uthaiwan Suttisansanee <sup>\*,†</sup>

Food and Nutrition Academic and Research Cluster, Institute of Nutrition, Mahidol University, Salaya, Phuttamonthon, Nakhon Pathom 73170, Thailand; woorawee.int@mahidol.ac.th (W.I.); sirinapa.tha@mahidol.ac.th (S.T.); chanakan.khe@mahidol.ac.th (C.K.); nattira.onn@mahidol.ac.th (N.O.-N.); chaowanee.chu@mahidol.ac.th (C.C.); yuraporn.sah@mahidol.edu (Y.S.); piya.tem@mahidol.ac.th (P.T.)

\* Correspondence: uthaiwan.sut@mahidol.ac.th

<sup>†</sup> These authors contributed equally to this work

---

## Supplementary Table S1:

Colors and moisture contents of fresh sample and *H. heteroclita* oilseed cake powders (OCPs).

| Samples | Color Analysis |              |              | Moisture Content (%) |
|---------|----------------|--------------|--------------|----------------------|
|         | L*             | a*           | b*           |                      |
| Fresh   | 73.43 ± 0.22   | 0.35 ± 0.04  | 20.10 ± 0.06 | 2.82 ± 0.15          |
| NP-OCP  | 75.83 ± 1.92   | 2.63 ± 0.06  | 22.30 ± 0.10 | 3.68 ± 0.52          |
| HP-OCP  | 80.13 ± 1.13   | 1.88 ± 0.48  | 21.17 ± 1.28 | 3.64 ± 0.63          |
| HEP-OCP | 65.41 ± 1.38   | 11.20 ± 0.68 | 35.95 ± 1.22 | 4.68 ± 0.52          |

All data are expressed as mean ± standard deviation (SD) of triplicate experiments ( $n = 3$ ). Colors were analyzed by a ColorFlex EZ spectrophotometer, where L\* representing dark (0) to white (100) colors, a\* representing green (-) to red (+) colors, and b\* representing blue (-) to yellow (+) colors. NP-OCP: OCP obtained from no pretreatment method; HP-OCP: OCP obtained from heat pretreatment by drying at 55 °C until reaching 10% moisture content; HEP-OCP: OCP obtained from heat and enzymatic pretreatments using 2.98% (*w/w*) enzyme loading, 48 °C of incubation temperature and 76 min of incubation time.

Supplementary Figure S1:

The liquid chromatography-electrospray ionization tandem mass spectrometry (LC-ESI-MS/MS) chromatograms of (A) fresh sample, (B) no pretreatment oilseed cake powder (NP-OCP), (C) heat pretreatment oilseed cake powder (HP-OCP) and (D) heat and enzymatic pretreatment (HEP-OCP).

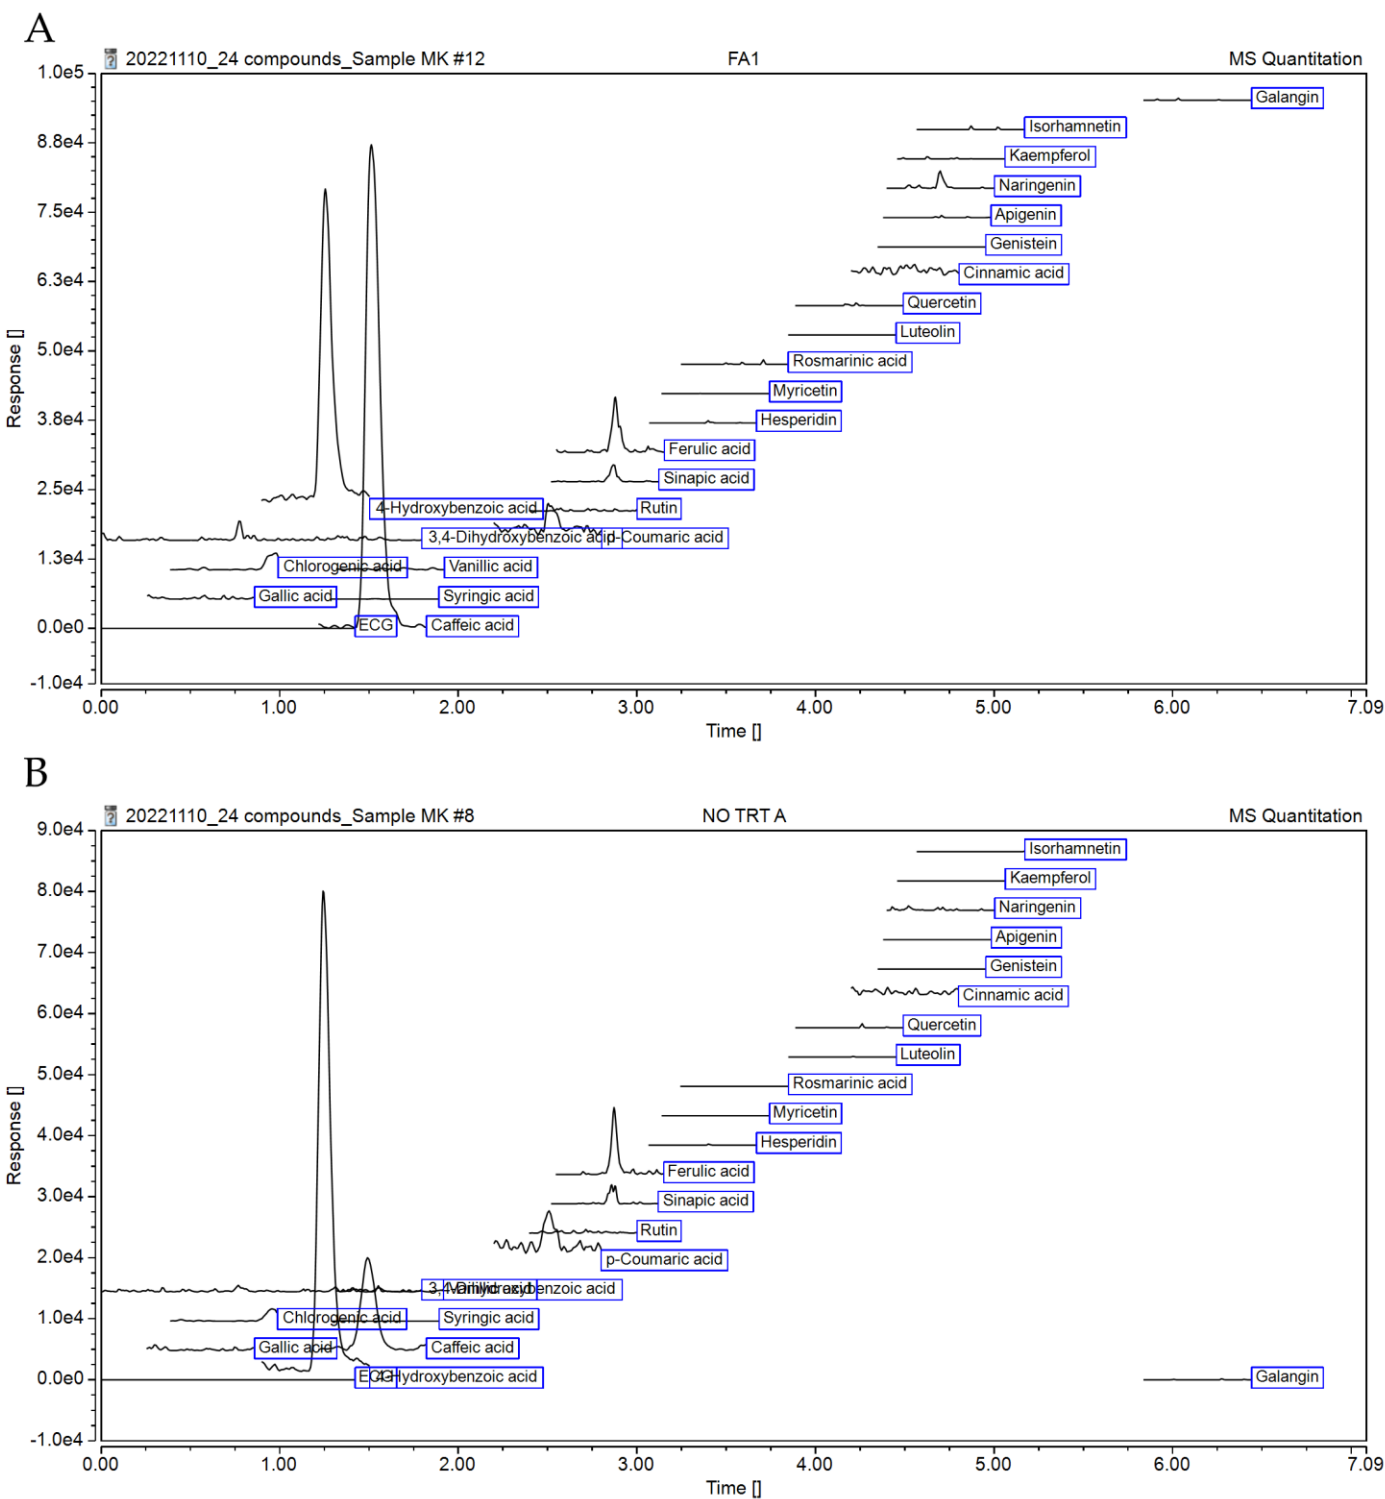

Supplementary Figure S1 (Cont.):

The liquid chromatography-electrospray ionization tandem mass spectrometry (LC-ESI-MS/MS) chromatograms of (A) fresh sample, (B) no pretreatment oilseed cake powder (NP-OCP), (C) heat pretreatment oilseed cake powder (HP-OCP) and (D) heat and enzymatic pretreatment (HEP-OCP).

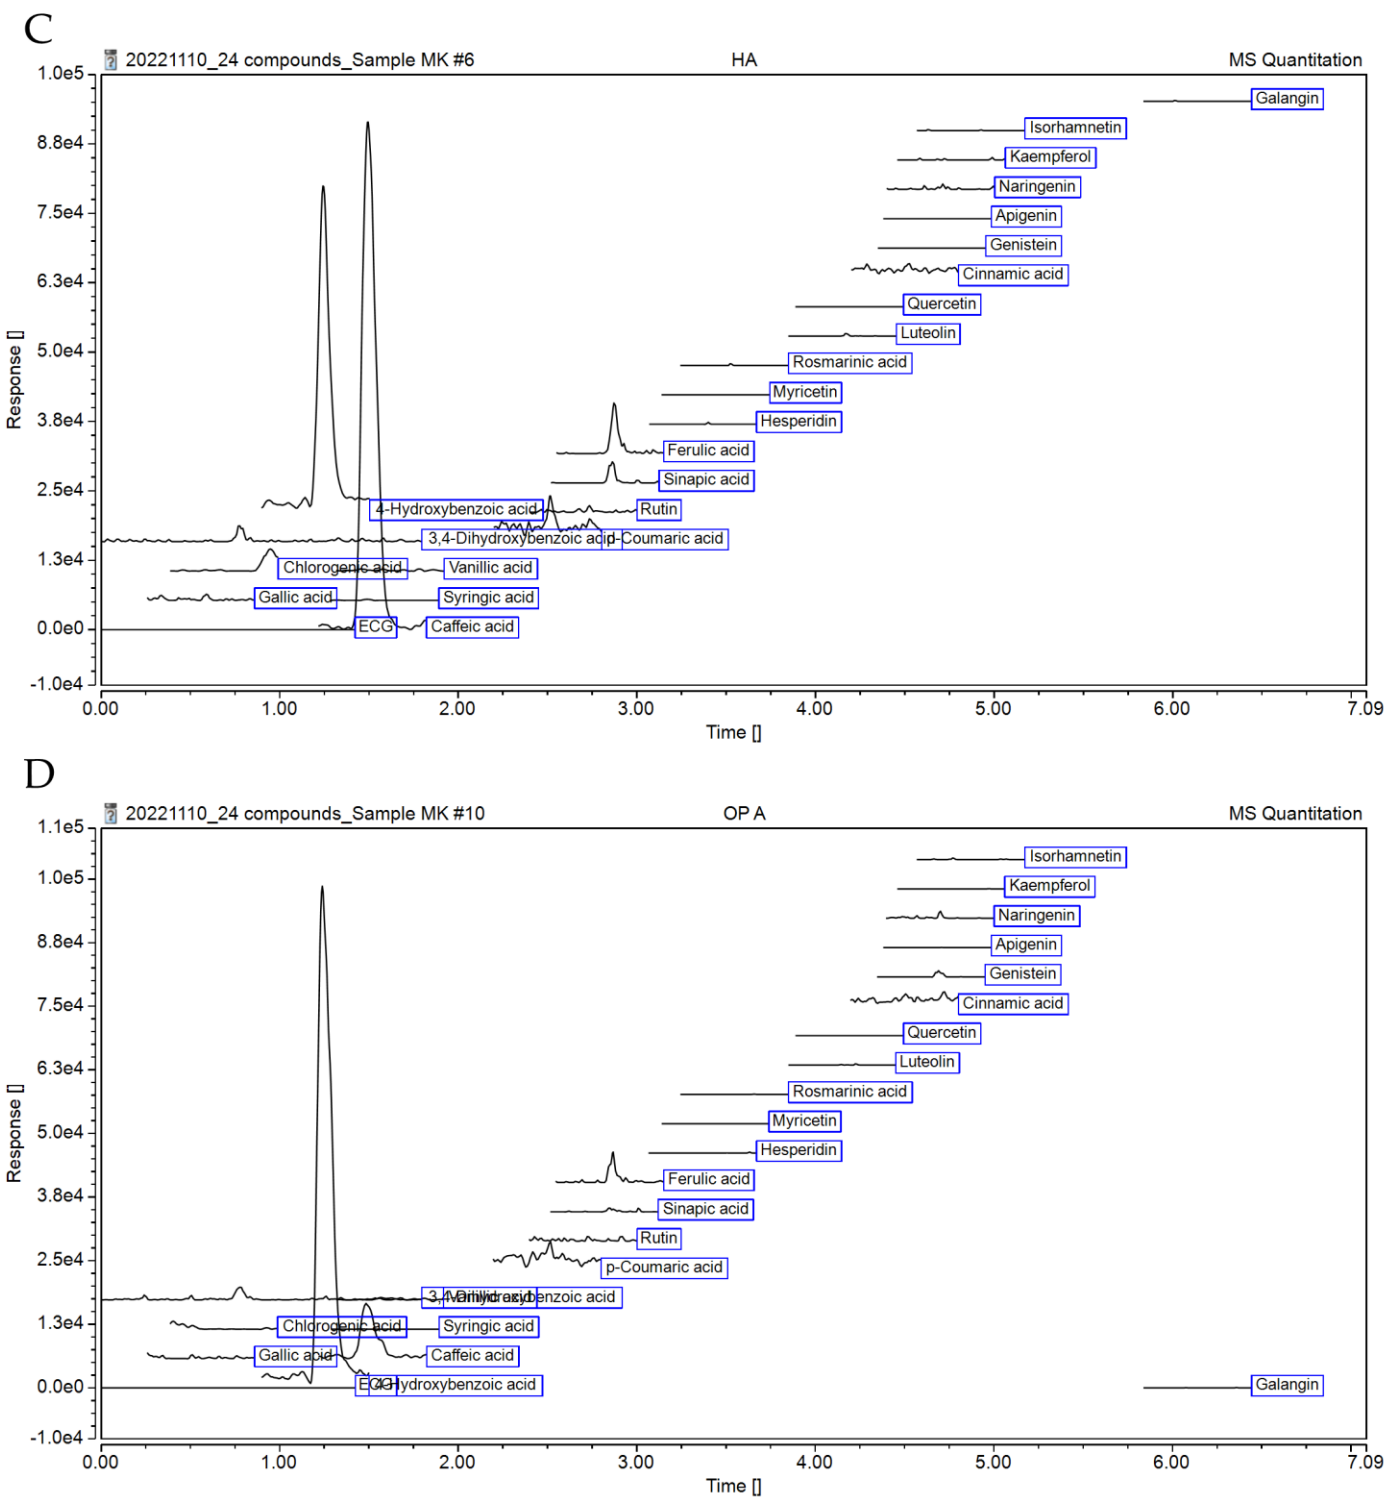

Supplement: s1 [file s1]
